# Supplementary material for: Transcriptomics and Proteomics of Haemonchus contortus in Response to Ivermectin Treatment
Source: MDPI journal article supplement (doi:10.3390/ani13050919), 2023-03-03
Supplement: s1 [file s1]

**Additional File 1: Table S2. Primer sequences used for qPCR analysis.**

| Gene ID                     | Forward primer         | Reverse primer         |
|-----------------------------|------------------------|------------------------|
| TRINITY_DN40923_c0_g1_i6_2  | GCCCACCACAAGAGTGCCATTG | TGTTGCGTGCGATGCGTACTG  |
| TRINITY_DN42866_c0_g1_i4_2  | ACCAGGTCTACCACCAGGATGG | TGTCGTCGTGCCCTTGAATTGC |
| TRINITY_DN35249_c0_g1_i1_4  | CGCCGTCACAGGTCCTGAGG   | AGCCGTCCATCGTCAGCAAATG |
| TRINITY_DN30346_c0_g1_i1_3  | CCACCCGAAGCCAGACACAATG | TGCAGCGGCCACGGAAAATAAG |
| TRINITY_DN33809_c0_g1_i3_1  | AGTCGCATCGCAATGGGTCAAC | TGGCTCAGAGGTCGTCGTAACG |
| TRINITY_DN33068_c0_g1_i6_4  | GCCTGGGAAGAAGCCGTTGTC  | TTCTGGCGTGTCAGGCTCAAAC |
| TRINITY_DN35070_c0_g1_i3_3  | ACATCCACCCTGCCACTACCTC | GCCAAGAGCCAACAGAGATCCG |
| TRINITY_DN36503_c0_g1_i4_4  | TCCTCGTTCTTCGGAGCCACTG | TGCCTGCACCGCCTCCTG     |
| TRINITY_DN42927_c0_g1_i9_2  | TCGGCTAGGCTCCTGCATCTC  | CTTCCGCCCAACTTCCACTTCC |
| TRINITY_DN35863_c0_g1_i2_4  | CAGTCAGCAGTCTCGGCTTTGG | ACCCACACGTAGACCCACATCC |
| TRINITY_DN41054_c1_g1_i11_1 | CGCTGGTCAATGTCCGAGATGC | CGCACGGCTCATCACACTCTG  |
| TRINITY_DN31657_c1_g1_i3_2  | CACCTTCTCGGCTGATGCAGAG | ACAGACTCGCACCCTCACAGG  |
| TRINITY_DN44484_c0_g1_i1_4  | AACGCCACACCACAATCACTG  | TCCAGAAGCGGTTCGGTGAGC  |
| TRINITY_DN35559_c0_g1_i3_1  | TGAAGCACAGCAGCAGACAAGC | TGACGAGTCCCTGGCAAGAACC |
| TRINITY_DN32885_c0_g2_i11_3 | CCTGCTCGATCACGGCCTTTAC | CTCAGCCGCCACAGTTCTAAGC |
| TRINITY_DN35871_c0_g1_i4_2  | GCTCTACCACCAGCTCAAACC  | GTTTGCCTCCAGAGAGGGCTTC |
| TRINITY_DN39784_c0_g1_i12_2 | TTCCTGGCACCAAGCATGTCAC | AGAGGCGGTTACGAGGCTTCC  |
| $\beta$ -tublin             | TGCTATGTTCCGTGGTCGTATG | CGGCAGTCTTAACGTTGTTTG  |
