# Supplementary material for: Transcriptomics and Proteomics of Haemonchus contortus in Response to Ivermectin Treatment
Source: MDPI journal article supplement (doi:10.3390/ani13050919), 2023-03-03
Supplement: s1 [file s1]

**Additional File2: Table S3. Quality metrics of the clean reads**

| Sample | raw_reads | raw_bases  | clean_reads | clean_bases | valid_bases | Q30    | GC     |
|--------|-----------|------------|-------------|-------------|-------------|--------|--------|
| R0_1   | 49264050  | 7389607500 | 48031754    | 6898484167  | 93.35%      | 94.83% | 46.96% |
| R0_2   | 49312626  | 7396893900 | 48008416    | 6924796558  | 93.62%      | 94.76% | 46.86% |
| R0_3   | 49474092  | 7421113800 | 48298698    | 7000416046  | 94.33%      | 94.84% | 47.03% |
| R1_1   | 49146128  | 7371919200 | 48102856    | 6932801591  | 94.04%      | 95.18% | 46.89% |
| R1_2   | 49485514  | 7422827100 | 48272780    | 6968416693  | 93.88%      | 94.61% | 47.00% |
| R1_3   | 49372184  | 7405827600 | 48226140    | 6961794348  | 94.00%      | 94.82% | 46.90% |
| S0_1   | 49606180  | 7440927000 | 48437128    | 6954565195  | 93.46%      | 94.80% | 46.88% |
| S0_2   | 49298472  | 7394770800 | 48239314    | 6980366586  | 94.40%      | 95.03% | 46.87% |
| S0_3   | 48945532  | 7341829800 | 47767524    | 6893094153  | 93.89%      | 94.44% | 46.92% |
| S1_1   | 49775348  | 7466302200 | 48617334    | 7027730293  | 94.13%      | 94.81% | 46.93% |
| S1_2   | 49620380  | 7443057000 | 48664172    | 7028595624  | 94.43%      | 95.22% | 46.79% |
| S1_3   | 49721276  | 7458191400 | 48642132    | 7050589513  | 94.53%      | 94.95% | 46.77% |

Samples: Sample group names

raw\_reads: Original reads number

raw\_bases: Original sequencing volume

clean\_reads: The reads number after filtering

clean\_bases: The bases number after filtering

valid\_base: Percentage of available bases

Q30: The percentage of bases whose Phred number is greater than 30 in Raw Bases

GC: The percentage of the total number of G and C in clean bases to the total number of bases
